# Supplementary material
Source: Springer Nature journal article supplement (https://www.springermedizin.de/resource/supplementary/12916_2011_499_MOESM4_ESM.pdf/9599790)
Supplement: MOESM4 [file 9599790]

Was the spectrum of patients representative of the patients who will receive the test in practice

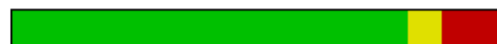

Were selection criteria clearly described?

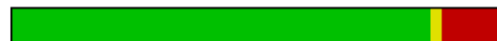

Is the reference standard likely to correctly classify the target condition?

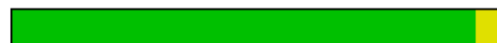

time between tests

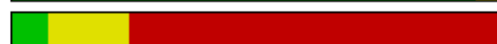

All verified with reference test

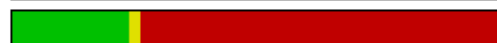

Did patients receive the same reference standard regardless of the index test result?

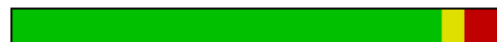

Was the reference standard independent of the index test (i.e. the index test did not form part of the reference standard)?

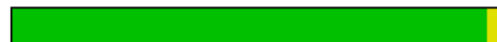

description of execution of index test

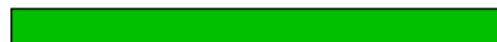

description of execution of reference test

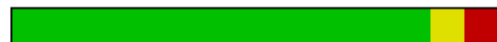

Interpret index test independently

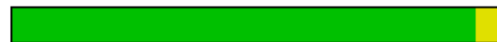

Interpret reference test independently

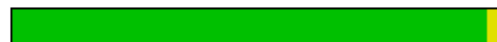

Were the same clinical data available when test results were interpreted as would be available when the test is used in practice?

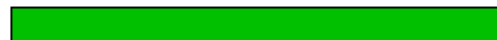

withdrawals explained

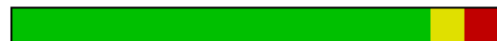

Were all intermediate/uninterpretable test results reported?

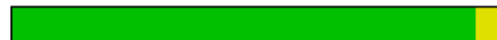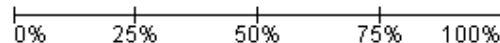

Low risk of bias

Unclear risk of bias

High risk of bias
